# Supplementary material for: Giant dielectric permittivity of detonation-produced nanodiamond is caused by water
Source: Royal Society of Chemistry journal article supplement (doi:10.1039/c2jm30836c), 2012-01-01
Supplement: c2jm30836c.pdf [file c2jm30836c.pdf]

## Supporting Information

### Giant dielectric permittivity of detonation-produced nanodiamond is caused by water

Stepan S. Batsanov, Sergei M. Gavrilkin, Andrei S. Batsanov, Konstantin B. Poyarkov,  
Inna I. Kulakova, David W. Johnson, Budhika G. Mendis

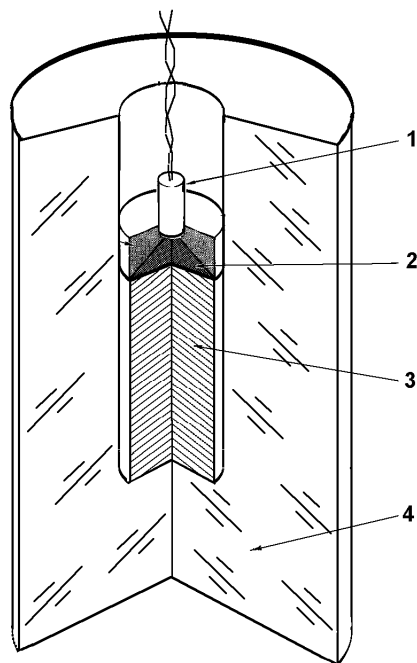

**Figure S1.** Explosive experiment setting for DND synthesis: (1) detonator, (2) generator of plane shock-wave, (3) TNT-RDX alloy, (4) ice shell. Reproduced with permission from: S. M. Gavrilkin, S. S. Batsanov, Yu. A. Gordopolov and A. S. Smirnov, *Propellants, Explosives, Pyrotechnics*, 2009, **34**, 469. Copyright 2009 John Wiley and Sons

**Table S1.** Langmuir and BET results

| Experiment   | sample mass (g) | BET model                          |                                      | C      | Langmuir model                     |                                      |
|--------------|-----------------|------------------------------------|--------------------------------------|--------|------------------------------------|--------------------------------------|
|              |                 | surface area S (m <sup>2</sup> /g) | correlation coefficient <sup>a</sup> |        | surface area S (m <sup>2</sup> /g) | correlation coefficient <sup>a</sup> |
| 1            | 0.2238          | 180.89                             | 0.9999832                            | 113.04 | 288.70                             | 0.993037                             |
| 2            | 0.2238          | 180.58                             | 0.9999695                            | 115.50 | 246.87                             | 0.997778                             |
| 3            | 0.2238          | 180.56                             | 0.9998793                            | 134.68 | 267.69                             | 0.999050                             |
| Low pressure | 0.2144          | 168.96                             | 0.9997691                            | 279.11 | 190.88                             | 0.998689                             |

<sup>a</sup>Correlation coefficients of >0.999 are necessary for a good fit.

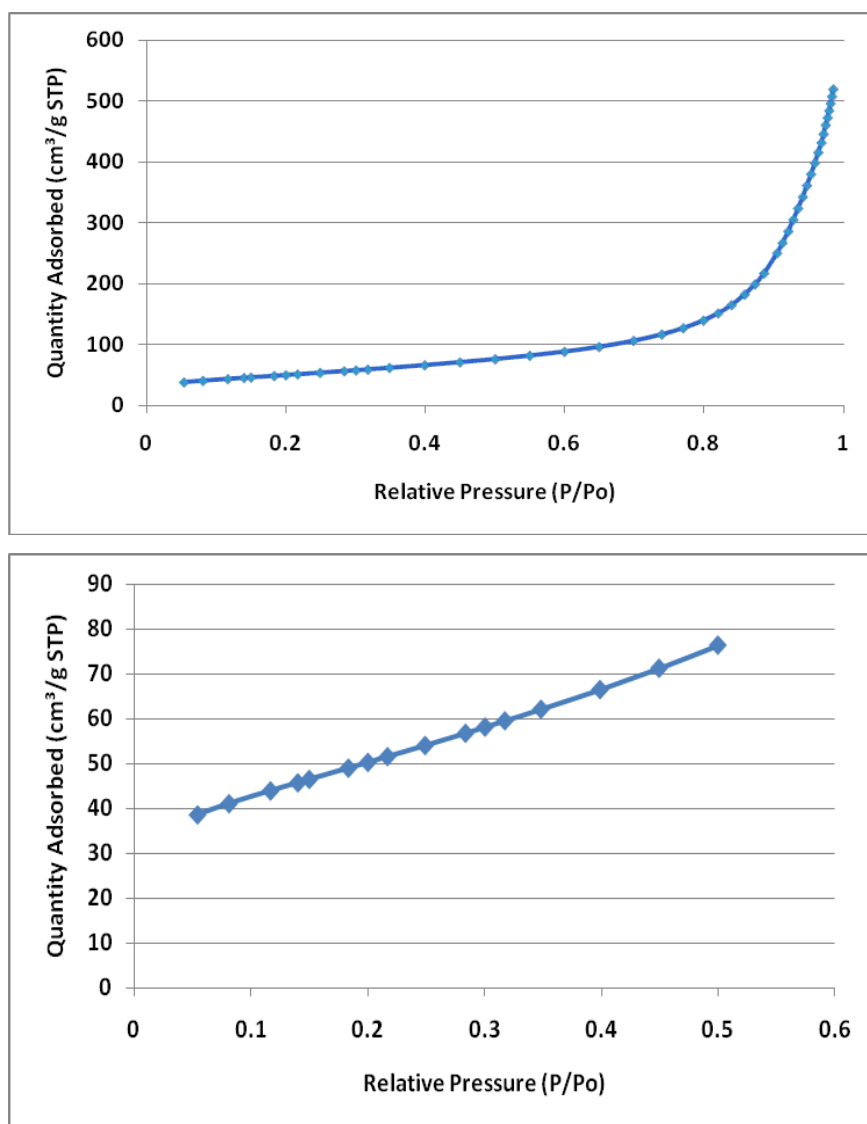

**Figure S2.** Adsorption isotherm of DND 1 (top) and its low–medium relative pressure range

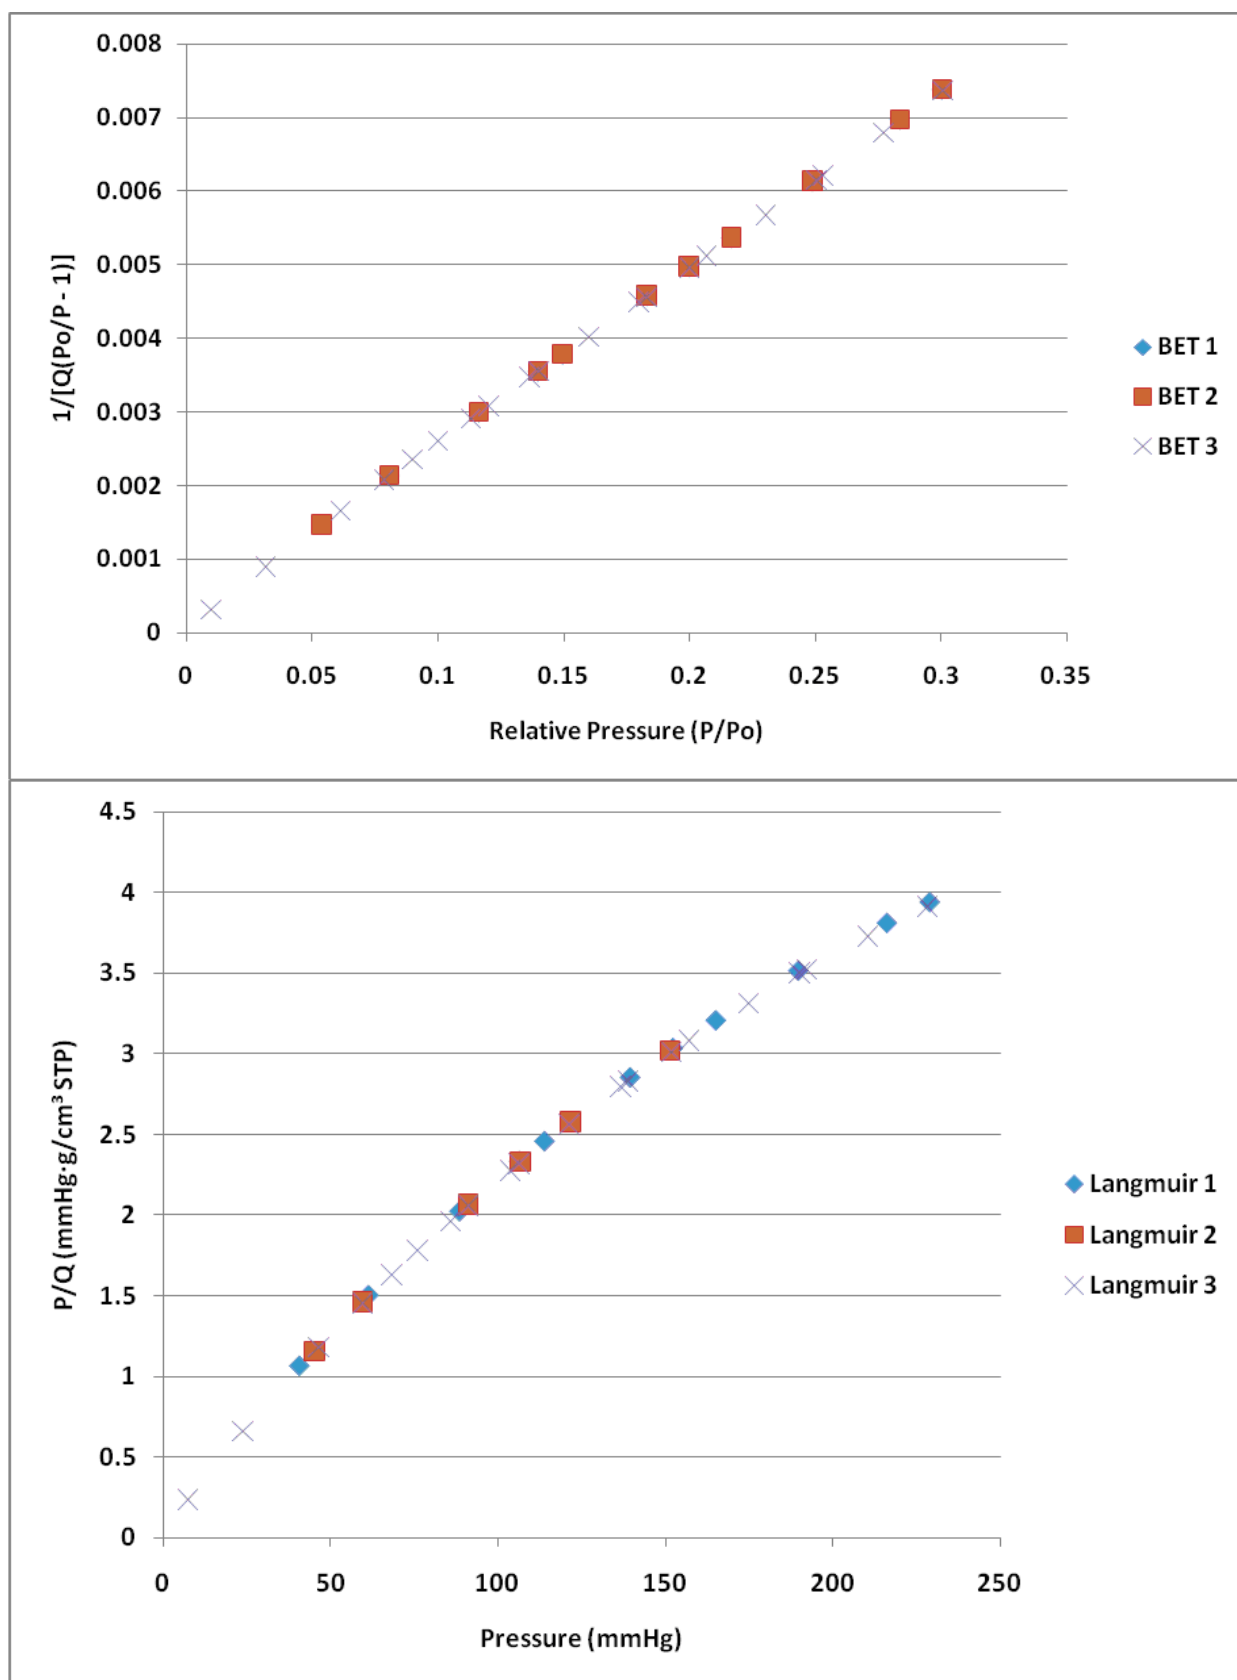

**Figure S3.** Surface area plots for BET (top) and Langmuir (bottom) models from 3 experiments

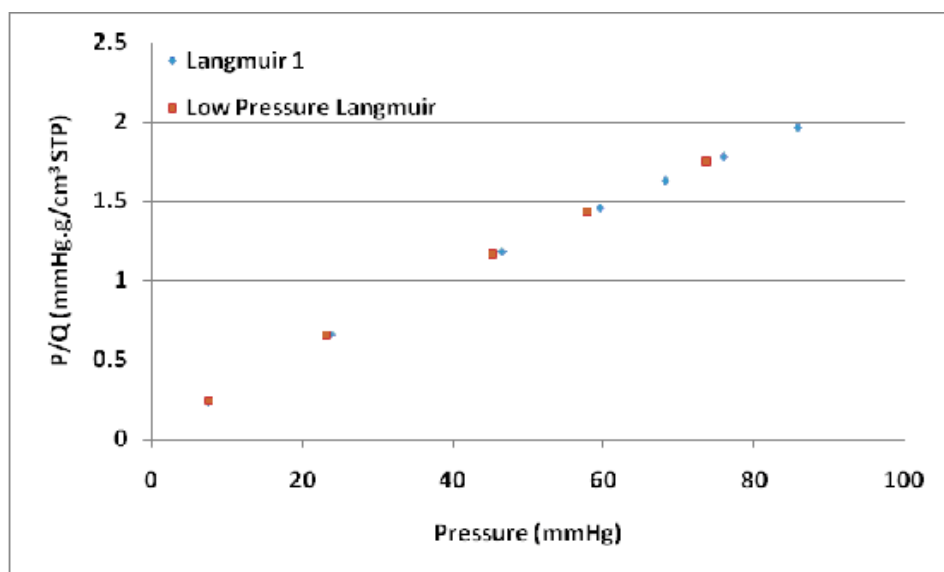

**Figure S4.** Langmuir surface area plots in experiment 1 and the low pressure experiment

**Gas pycnometry protocol.** The sample was weighed out into the sample cup, inserted into the pycnometer 10 cm<sup>3</sup> sample chamber, allowed to reach thermal equilibrium within the instrument (10 min) and then subjected to 50 purge cycles (He, 19.500 psig to 0 psig) to remove air and moisture from the chamber. The sample chamber pressure was increased to 19.500 psig, the chamber was then opened to a calibrated expansion volume. The pressure reading was then taken once the value was stable to  $\leq 0.005$  psig/min and was used to calculate the sample volume.

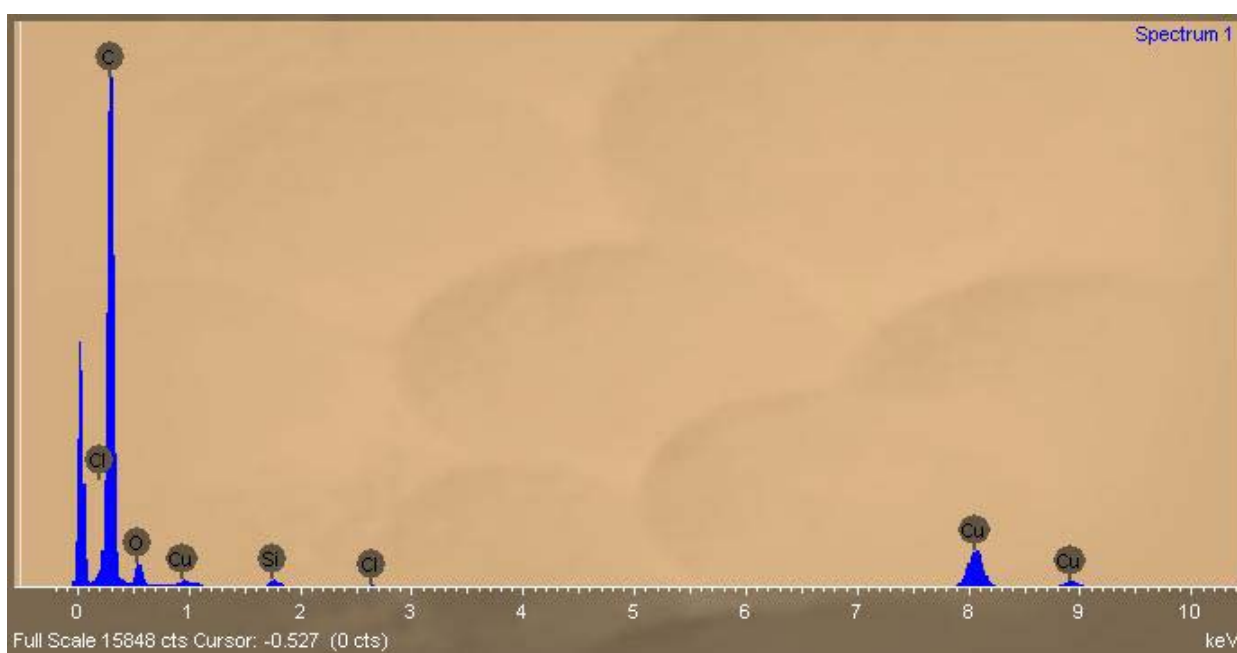

**Figure S5.** Energy-dispersive X-ray (EDX) spectrum of DND (1). Peaks other than carbon and oxygen originate from the sample holder.

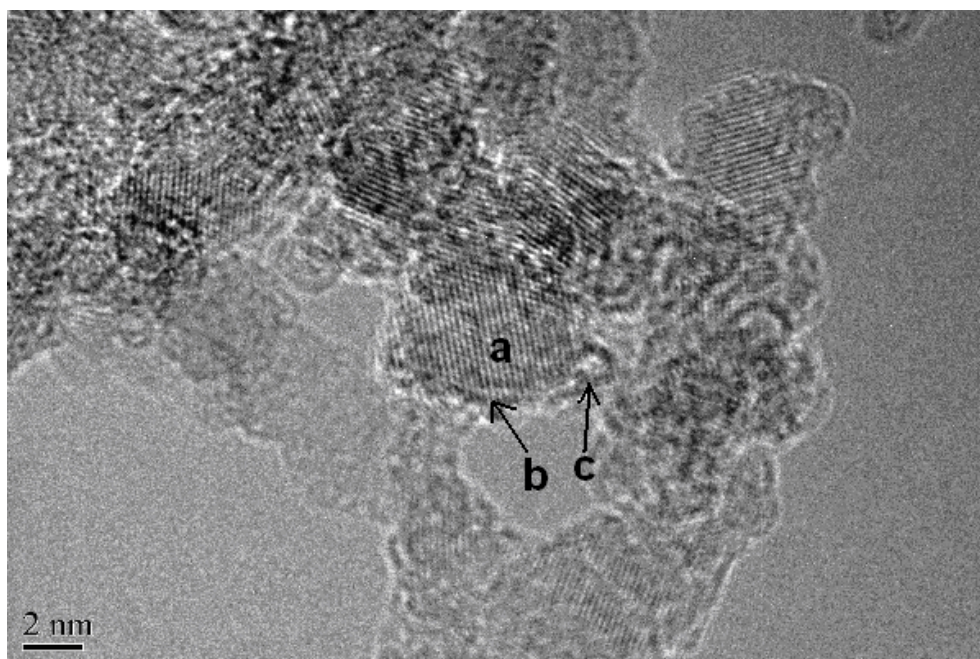

**Figure S6.** High-resolution TEM image of a freshly-prepared DND particle suspended over vacuum: (a) diamond core, (b) non-diamond shell, (c) spherical features of ca. 1 nm diameter may be interpreted as a fullerene cage.

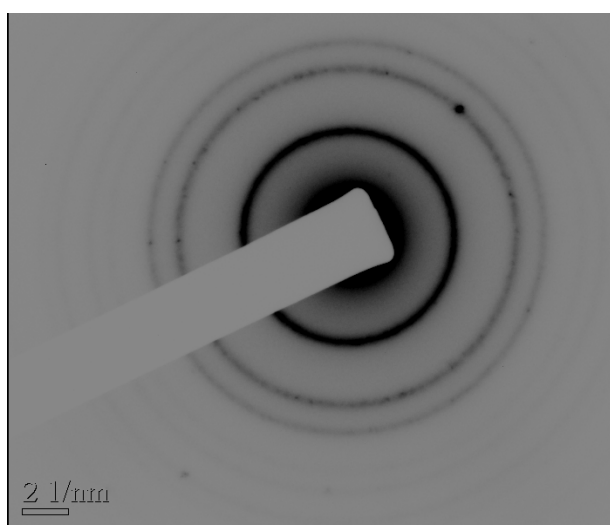

**Figure S7.** Electron diffraction pattern of freshly-prepared DND. Spots originate from a single 20 nm particle, rings from the predominant 4 – 5 nm particles.

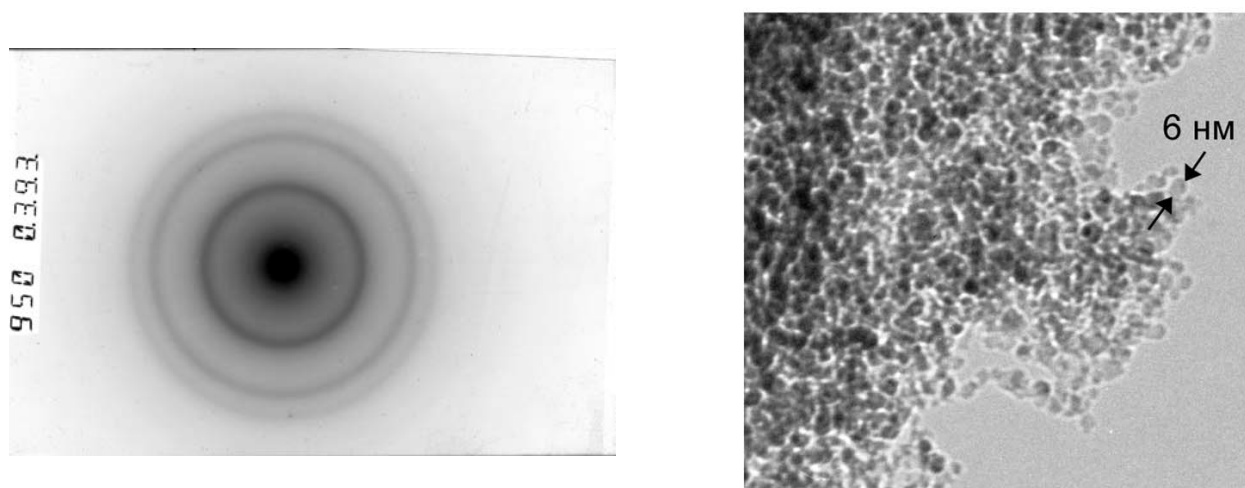

**Figure S8.** TEM image (right) and electron diffraction pattern (left) of the DND particles recovered from the cold trap during drying of DND samples. Compare with Figures 1 and S7

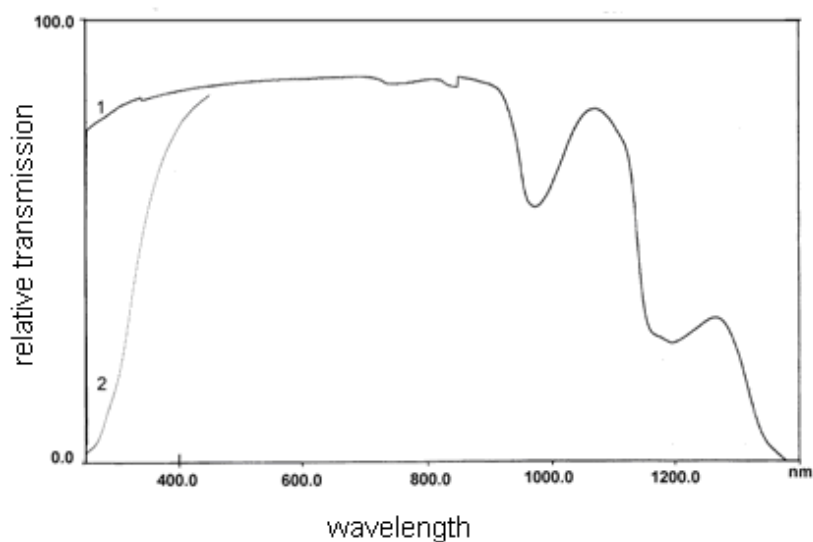

**Figure S9.** UV spectra of pure water (1) and “diamond water” (2).

**Table S2.** Sound velocity (m/s) in “diamond water” ( $W_D$ ) and pure water ( $W_o$ ) vs temperature

| $t^{\circ}\text{C}$ | $W_D$  | $W_o$  | $t^{\circ}\text{C}$ | $W_D$  | $W_o$  | $t^{\circ}\text{C}$ | $W_D$  | $W_o$  |
|---------------------|--------|--------|---------------------|--------|--------|---------------------|--------|--------|
| 22                  | 1490.6 | 1487.5 | 14                  | 1463.6 | 1460.6 | 6                   | 1434.5 | 1429.7 |
| 21                  | 1488.4 | 1485.2 | 13                  | 1460.8 | 1458.3 | 5                   | 1430.7 | 1427.5 |
| 20                  | 1485.6 | 1482.8 | 12                  | 1458.3 | 1453.2 | 4                   | 1426.7 | 1424.8 |
| 19                  | 1482.4 | 1477.5 | 11                  | 1454.1 | 1450.9 | 3                   | 1424.1 | 1423.5 |
| 18                  | 1479.0 | 1475.1 | 10                  | 1450.3 | 1445.9 | 2                   | 1422.7 | 1421.4 |
| 17                  | 1477.3 | 1471.1 | 9                   | 1447.8 | 1441.4 | 1                   | 1420.6 | 1413.7 |
| 16                  | 1471.8 | 1467.6 | 8                   | 1442.6 | 1439.1 | 0                   | 1419.7 | 1409.7 |
| 15                  | 1469.2 | 1465.2 | 7                   | 1438.3 | 1434.1 |                     |        |        |

**Table S3.** Dielectric permittivity of “diamond water”: temperature dependence

| t°C | $\epsilon \times 10^6$ | t°C | $\epsilon \times 10^6$ | t°C | $\epsilon$        | t°C | $\epsilon$        |
|-----|------------------------|-----|------------------------|-----|-------------------|-----|-------------------|
| 22  | 2.16                   | 16  | 1.98                   | 10  | 1.76              | 4   | $1.54 \cdot 10^6$ |
| 21  | 2.13                   | 15  | 1.94                   | 9   | 1.73              | 3   | $4.10 \cdot 10^5$ |
| 20  | 2.08                   | 14  | 1.89                   | 8   | 1.70              | 2   | $2.59 \cdot 10^5$ |
| 19  | 2.06                   | 13  | 1.87                   | 7   | 1.66              | 1   | $3.56 \cdot 10^4$ |
| 18  | 2.02                   | 12  | 1.84                   | 6   | $1.62 \cdot 10^6$ | 0   | $5.5 \cdot 10^3$  |
| 17  | 2.00                   | 11  | 1.81                   | 5   | $1.59 \cdot 10^6$ | -1  | $2.95 \cdot 10^4$ |
